# Supplementary material
Source: Springer Nature journal article supplement (https://www.springermedizin.de/resource/supplementary/12888_2013_1485_MOESM3_ESM.pdf/9480450)

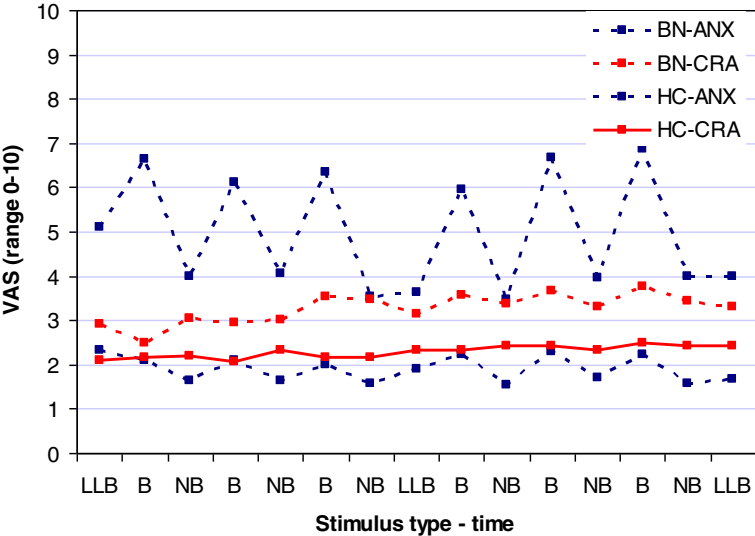

Supplement: MOESM3 [file 9480450]
